# Supplementary material for: Apollo Lunar Astronauts Show Higher Cardiovascular Disease Mortality: Possible Deep Space Radiation Effects on the Vascular Endothelium
Source: PubMed Central journal article supplement (PMC4964660; doi:10.1038/srep29901), 2016-07-28

# **Apollo Lunar Astronauts Show Higher Cardiovascular Disease Mortality: Possible Deep Space Radiation Effects on the Vascular Endothelium**

§Michael D. Delp, Ph.D.<sup>1</sup>, Jacqueline M. Charvat, Ph.D.<sup>2</sup>, Charles L. Limoli, Ph.D.<sup>3</sup>,  
Ruth K. Globus, Ph.D.<sup>4</sup> and Payal Ghosh, Ph.D.<sup>1</sup>

<sup>1</sup>Department of Nutrition, Food and Exercise Sciences, Florida State University,  
Tallahassee, FL 32306,

<sup>2</sup>Wyle Science, Technology and Engineering Group, Johnson Space Center, Houston  
TX 77058,

<sup>3</sup>Department of Radiation Oncology, University of California Irvine, Irvine, CA 92697,  
and

<sup>4</sup>Space Biosciences Division, NASA Ames Research Center, Moffett Field, CA 94035

§Correspondence: Michael D. Delp, Ph.D.

[mdelp@fsu.edu](mailto:mdelp@fsu.edu)

## Supplementary Figure Legends

- Figure 1. Effects of HU, TBI, and TBI+HU on vasoconstrictor responses to A) KCl and B) phenylephrine in gastrocnemius muscle feed arteries. Values are mean  $\pm$  SE.  $n$  = the number of animals studied. Vasoconstrictor responses are not different among groups.
- Figure 2. Effects of HU, TBI, and TBI+HU on A) active myogenic vasoconstrictor responses and B) passive pressure-diameter responses of gastrocnemius muscle feed arteries. Values are mean  $\pm$  SE.  $n$  = the number of animals studied. Responses are not different among groups.
- Figure 3. Effects of HU, TBI and TBI+HU on A) endothelial nitric oxide synthase (eNOS), B) superoxide dismutase-1 (SOD-1), and C) NADPH oxidase-2 (NOX-2) protein levels in gastrocnemius muscle feed arteries. Values are mean  $\pm$  SE.
- Figure 4. Effects of HU, TBI and TBI+HU on A) endothelial nitric oxide synthase (eNOS), B) superoxide dismutase-1 (SOD-1), and C) NADPH oxidase-2 (NOX-2) protein levels in coronary arteries. Values are mean  $\pm$  SE.

# Supplemental Figure 1

A.

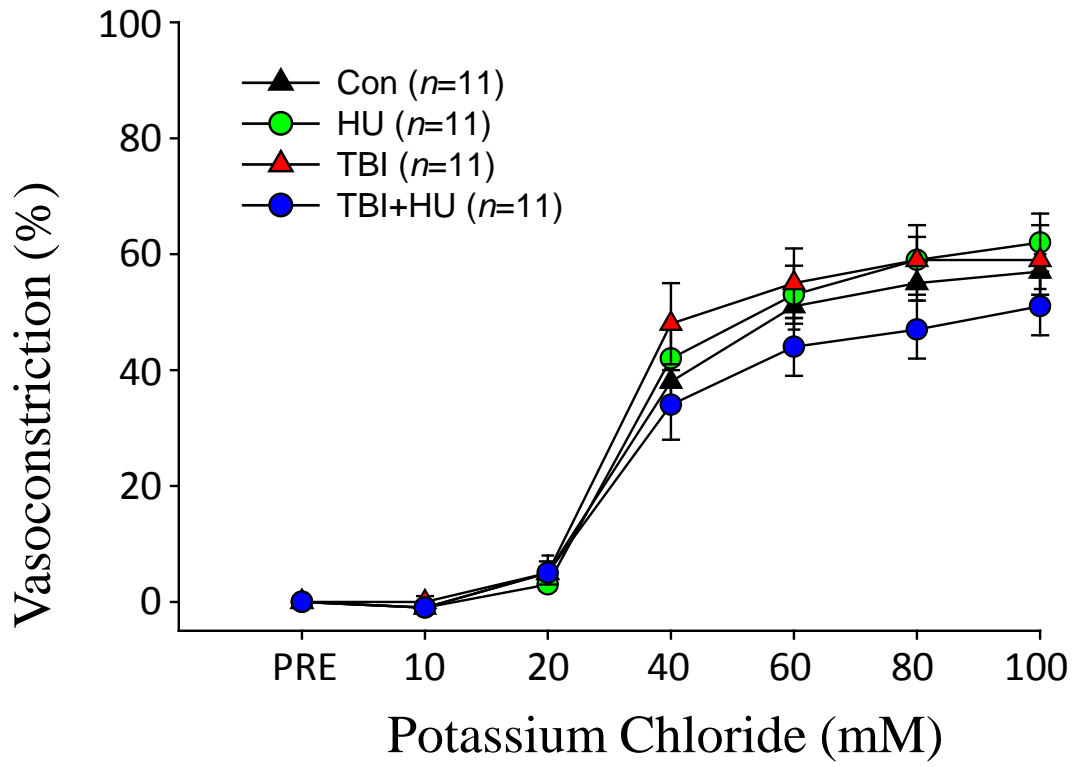

B.

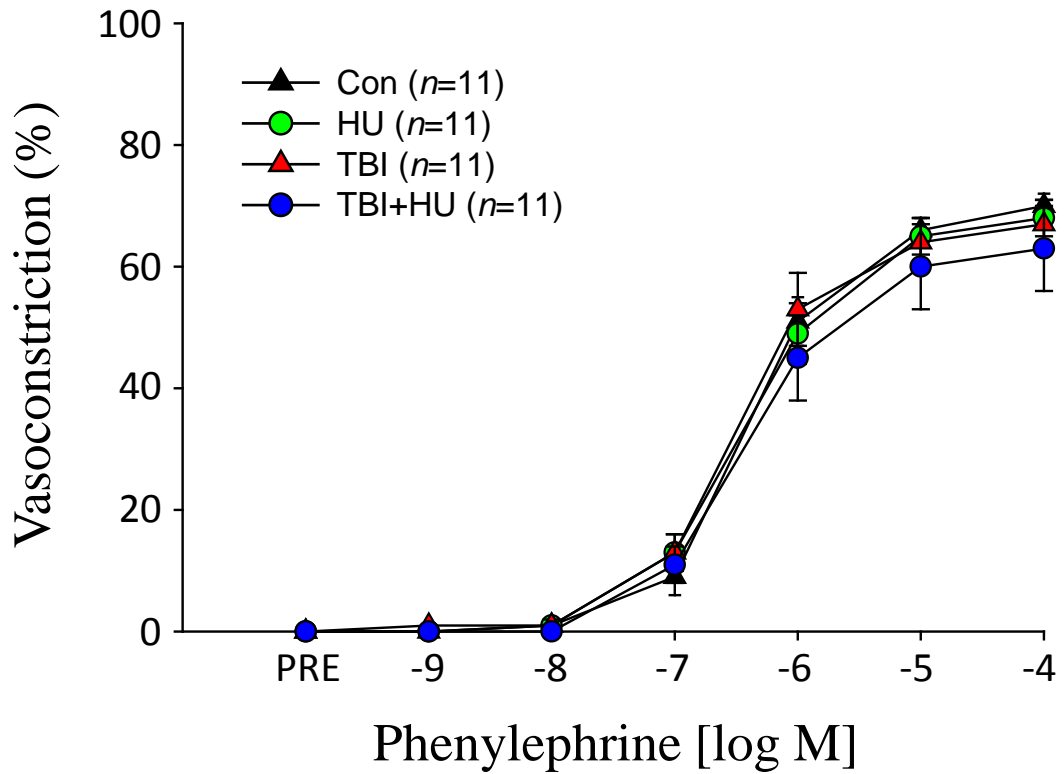

### Supplemental Figure 2

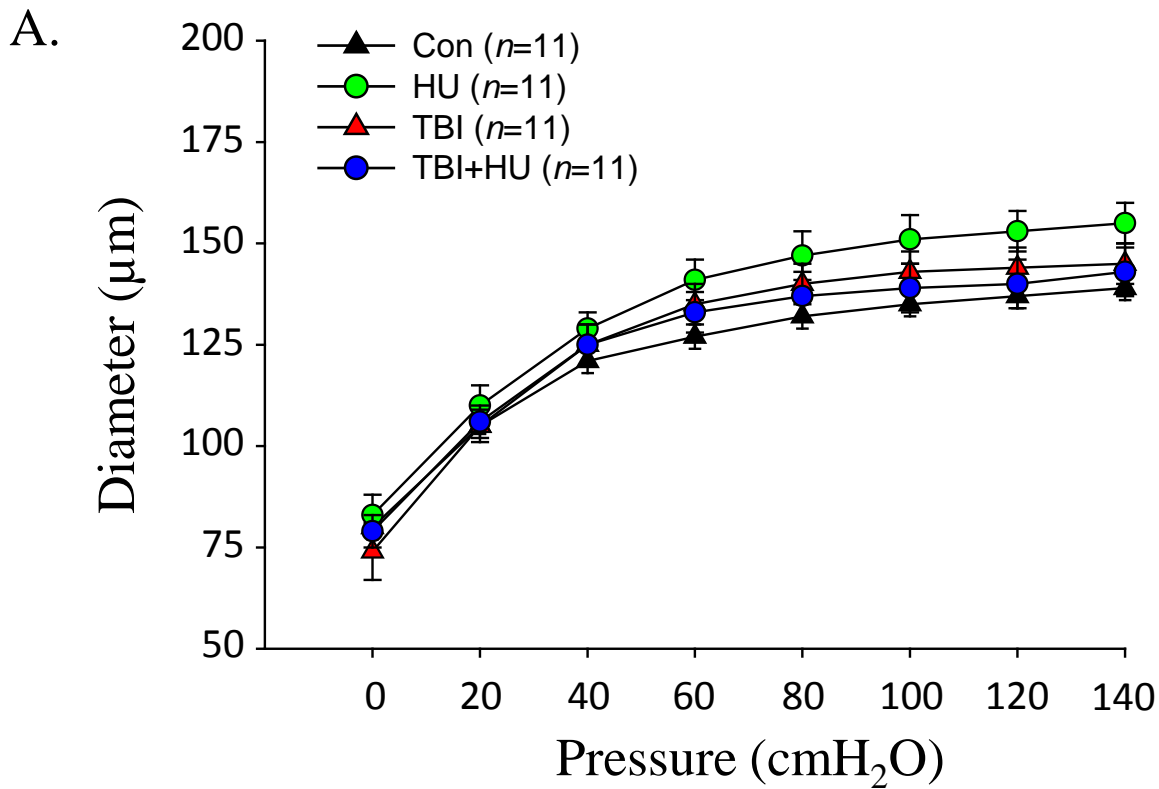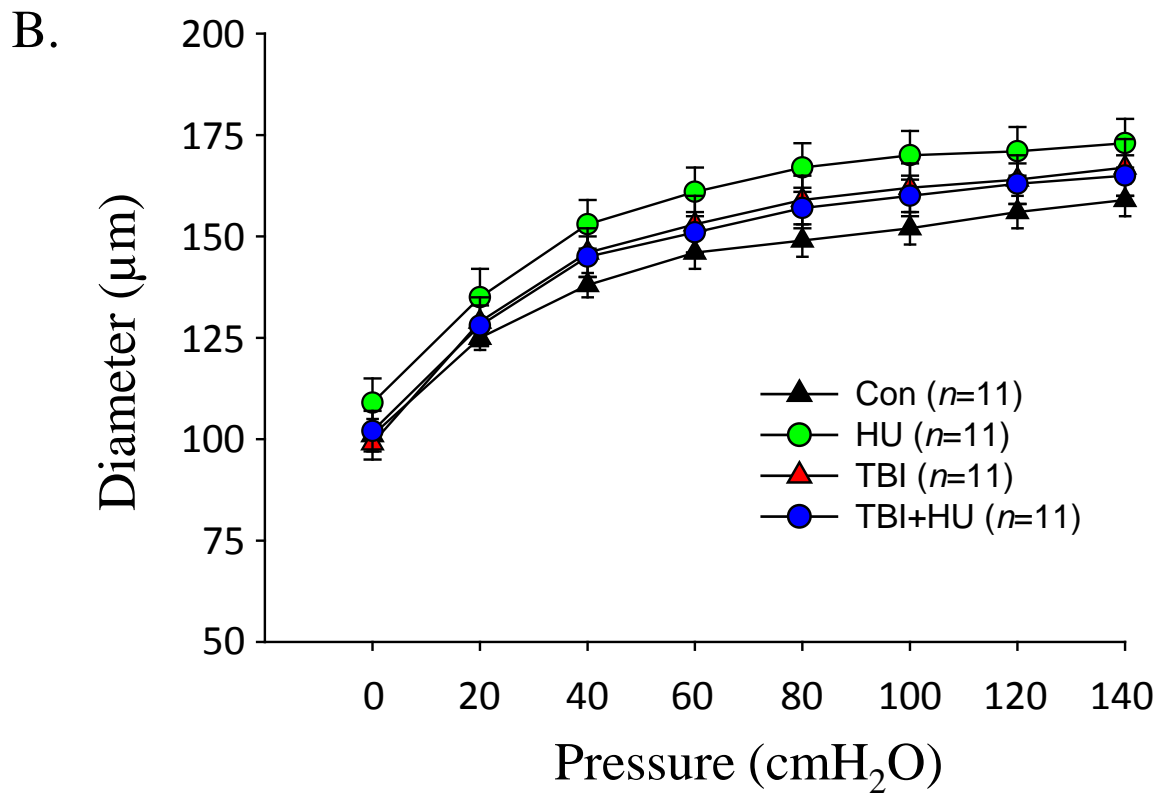

Supplemental Figure 3

A.

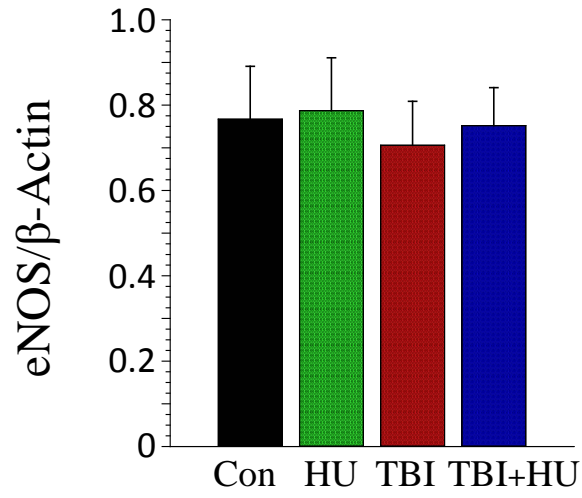

B.

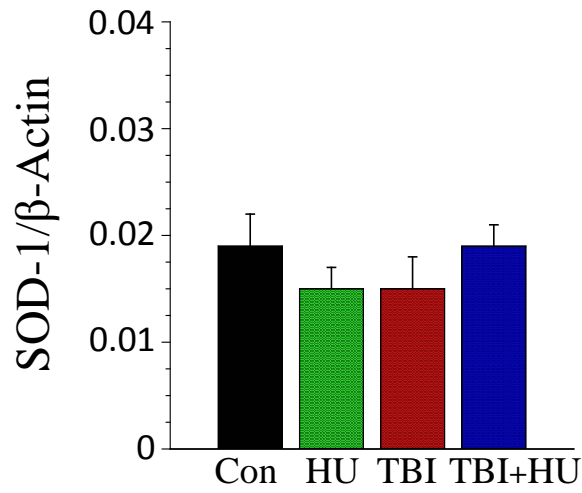

C.

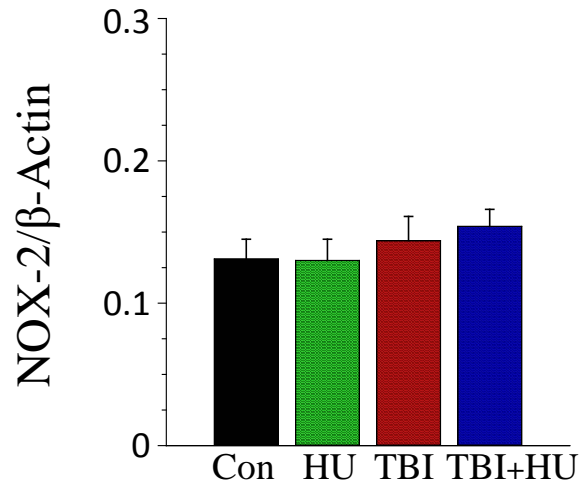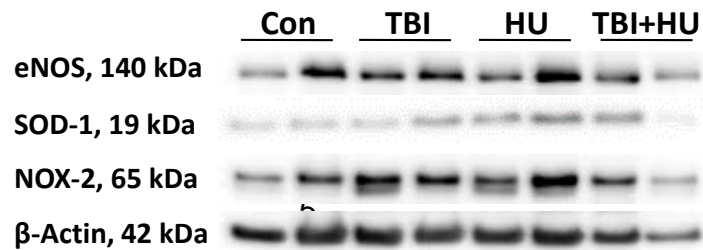

Supplemental Figure 4

A.

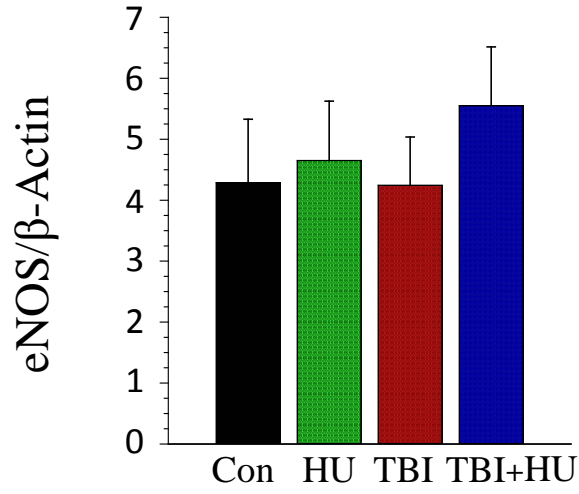

B.

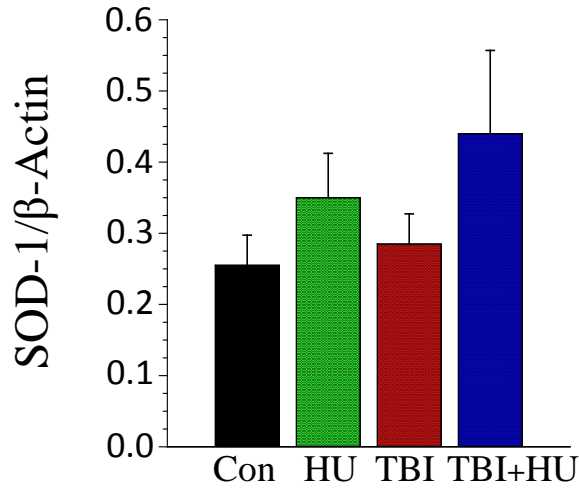

C.

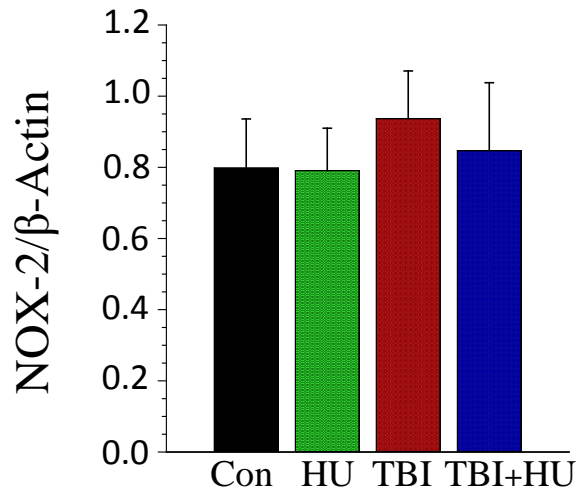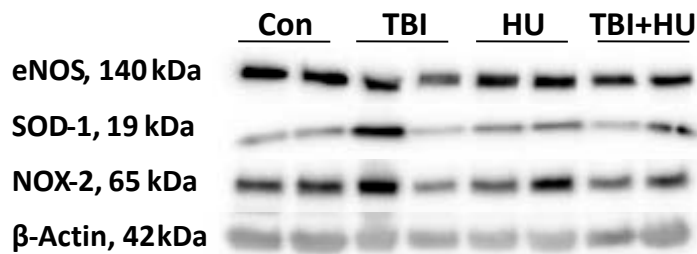

Supplement: srep29901-s1.pdf [file srep29901-s1.pdf]
